# Supplementary material
Source: PubMed Central journal article supplement (PMC5006917)
Supplement: koni-05-07-1192740-s001.pdf [file koni-05-07-1192740-s001.pdf]

## Supplementary Figure 1

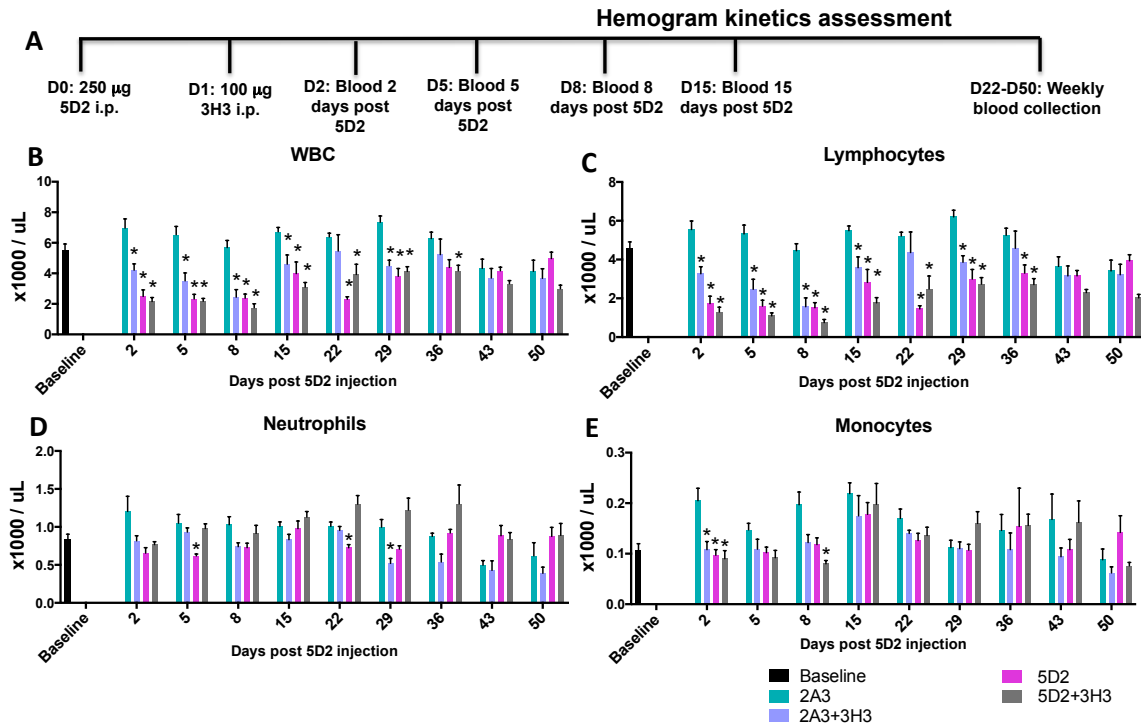

**Supplementary Figure 1:** Treatment with anti-CD20 and anti-CD137 reduces white blood cell numbers in WT mice without lymphoma. Blood samples were collected for hemogram assessment according to the experimental design proposed in **A**. White blood cell (**B**), lymphocyte (**C**), neutrophil (**D**) and monocyte (**E**) numbers are presented. Data shown is pooled from 2 independent experiments (n (2A3) = 10; n (5D2) = 10; n (3H3) = 10; n (5D2+3H3) = 10). Statistical analysis was calculated using Multiple T tests and a Holm-Sidak Method for multiple comparisons, \*P < 0.05 was considered statistically significant.

## Supplementary Figure 2

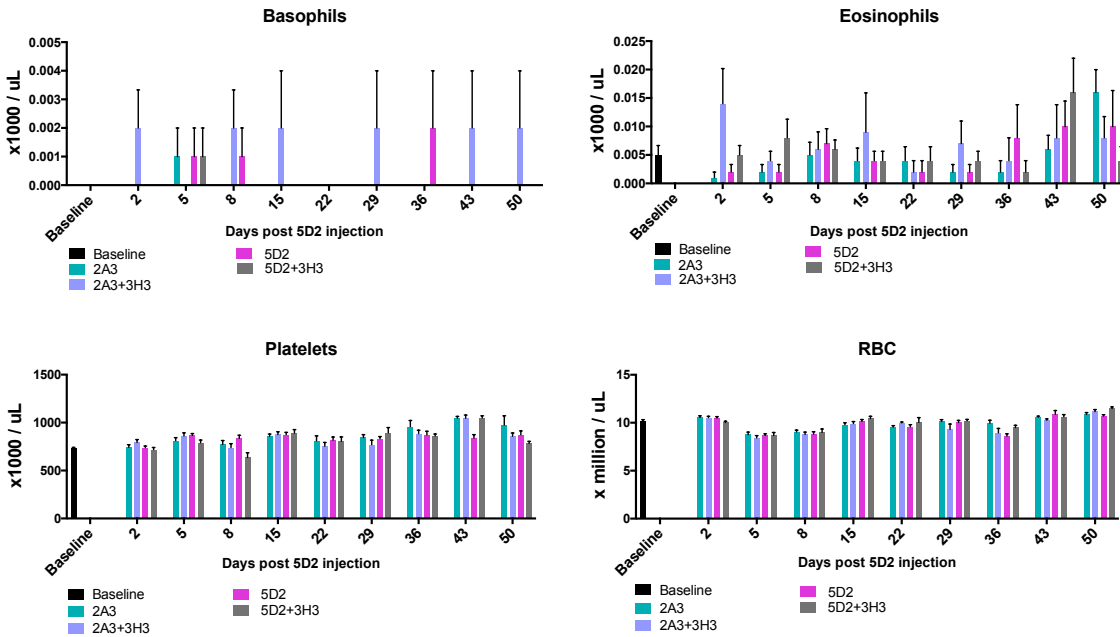

**Supplementary Figure 2:** Basophils, eosinophils, platelets and red blood cells (RBC) numbers following anti-CD20 and anti-CD137 treatment. Blood samples were collected for hemogram assessment according experimental setting proposed in **Supplementary Figure 1A**. Data shown is pooled from 2 independent experiments (n (2A3) = 10; n (5D2) = 10; n (3H3) = 10; n (5D2+3H3) = 10). Statistical analysis was calculated using Multiple T tests using Holm-Sidak Method for multiple comparisons.

### Supplementary Figure 3

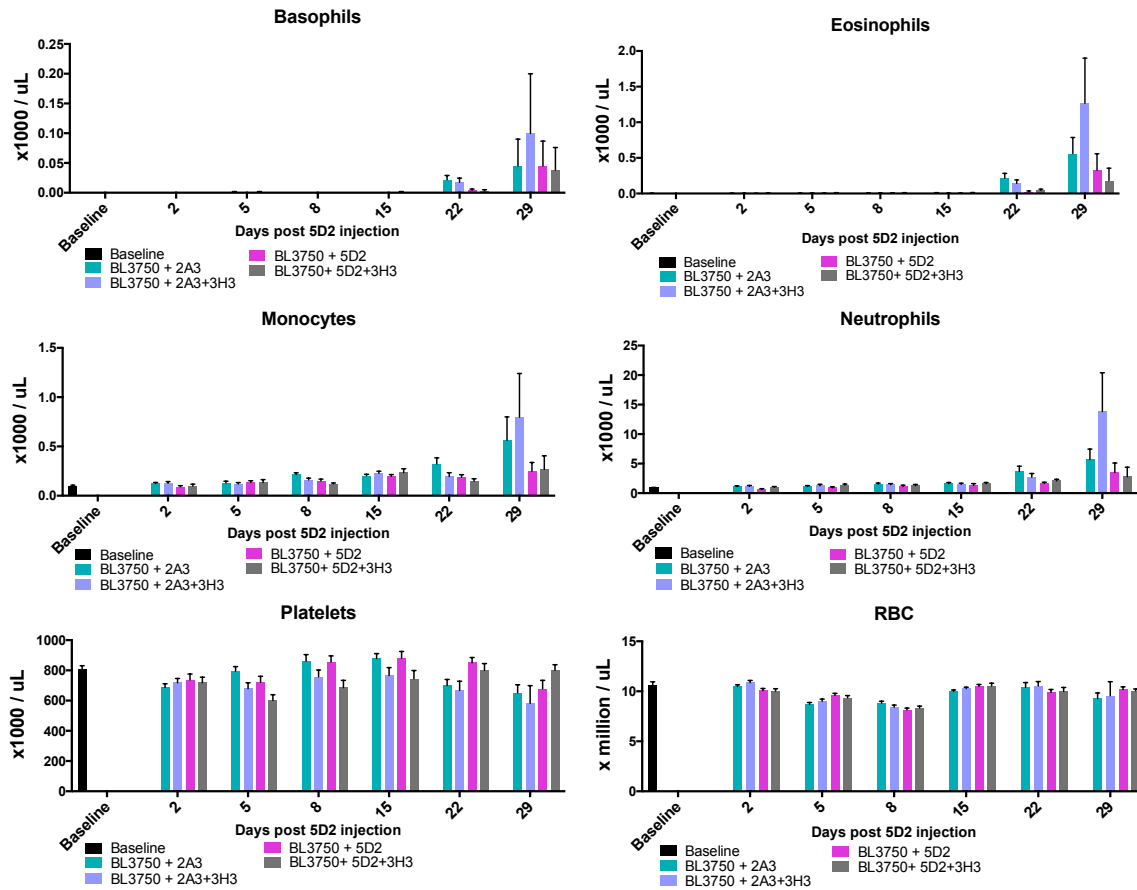

**Supplementary Figure 3:** Basophils, eosinophils, monocytes, neutrophils, platelets and red blood cells (RBC) numbers following anti-CD20 and anti-CD137 treatment in tumor bearing mice.  $1 \times 10^5$  BL3750 cells were injected i.v. into C57BL/6 wild-type (WT) mice at D0. Control Ig (2A3, 250  $\mu\text{g}$  i.p.) or anti-CD20 (clone 5D2, 250  $\mu\text{g}$  i.p.) was administered on day 4, and anti-CD137 (clone 3H3, 100  $\mu\text{g}$  i.p.) either alone or in combination on day 5. Blood samples were collected for hemogram assessment according to the experimental design proposed in **Figure 2A**. Data shown is pooled from 2 independent experiments (n (2A3) = 10; n (5D2) = 10; n (3H3) = 10; n (5D2+3H3) = 10). Statistical analysis was calculated using Multiple T tests using Holm-Sidak Method for multiple comparisons.

## Supplementary Figure 4

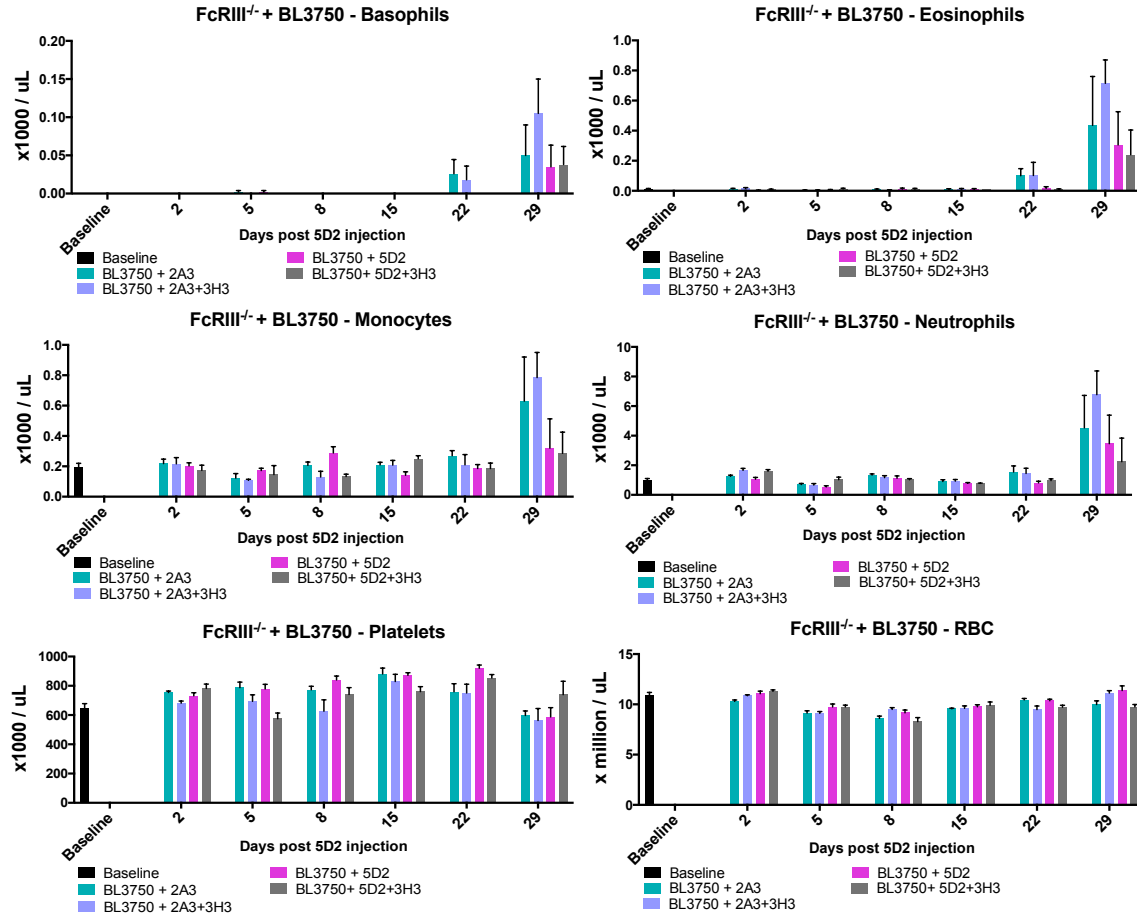

**Supplementary Figure 4:** Basophils, eosinophils, monocytes, neutrophils, platelets and red blood cells (RBC) numbers following anti-CD20 and anti-CD137 treatment in  $FcRIII^{-/-}$  mice.  $1 \times 10^5$  BL3750 cells were injected i.v. into  $FcRIII^{-/-}$  mice at D0. Control Ig (2A3, 250  $\mu g$  i.p.) or anti-CD20 (clone 5D2, 250  $\mu g$  i.p.) was administered on day 4, and anti-CD137 (clone 3H3, 100  $\mu g$  i.p.) either alone or in combination on day 5. Blood samples were collected for hemogram assessment according to the experimental design proposed in **Figure 2A**. Results are representative of one experiment,  $n = 6$  each group. Statistical analysis was calculated using Multiple T tests using Holm-Sidak Method for multiple comparisons.

## Supplementary Figure 5

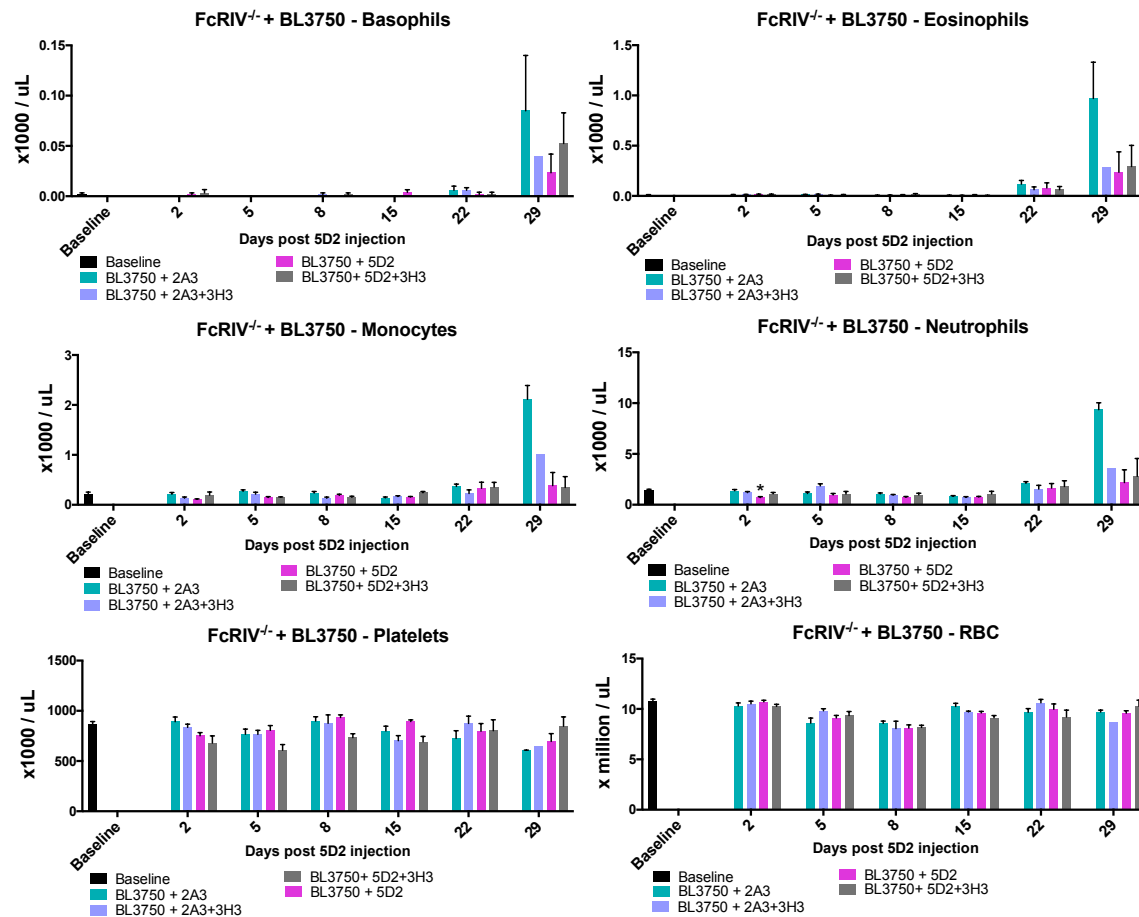

**Supplementary Figure 5:** Basophils, eosinophils, monocytes, neutrophils, platelets and red blood cells (RBC) numbers following anti-CD20 and anti-CD137 treatment in  $FcR1V^{-/-}$  mice.  $1 \times 10^5$  BL3750 cells were injected i.v. into  $FcR1V^{-/-}$  mice at D0. Control Ig (2A3, 250  $\mu g$  i.p.) or anti-CD20 (clone 5D2, 250  $\mu g$  i.p.) was administered on day 4, and anti-CD137 (clone 3H3, 100  $\mu g$  i.p.) either alone or in combination on day 5. Blood samples were collected for hemogram assessment according to the experimental design proposed in **Figure 2A**. Results are representative of one experiment,  $n = 6$  each group. Statistical analysis was calculated using Multiple T tests using Holm-Sidak Method for multiple comparisons.

## Supplementary Figure 6

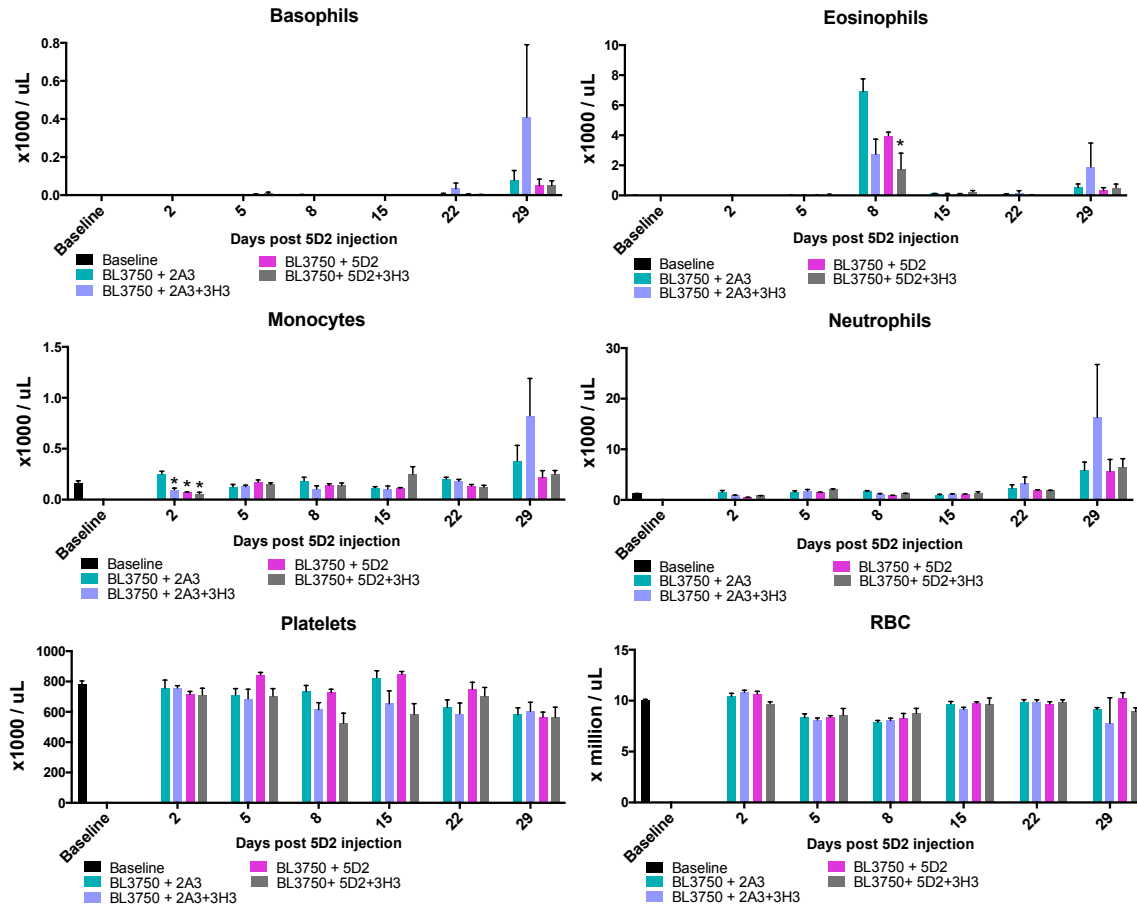

**Supplementary Figure 6:** Basophils, eosinophils, monocytes, neutrophils, platelets and red blood cells (RBC) kinetics after following anti-CD20 and anti-CD137 treatment in  $Fc\gamma R^{-/-}$  mice.  $1 \times 10^5$  BL3750 cells were injected i.v. into  $Fc\gamma R^{-/-}$  mice at D0. Control Ig (2A3, 250  $\mu\text{g}$  i.p.) or anti-CD20 (clone 5D2, 250  $\mu\text{g}$  i.p.) was administered on day 4, and anti-CD137 (clone 3H3, 100  $\mu\text{g}$  i.p.) either alone or in combination on day 5. Blood samples were collected for hemogram assessment according to the experimental design proposed in **Figure 2A**. Results are representative of one experiment,  $n = 6$  each group. Statistical analysis was calculated using Multiple T tests using Holm-Sidak Method for multiple comparisons.

**Supplementary Figure 7**

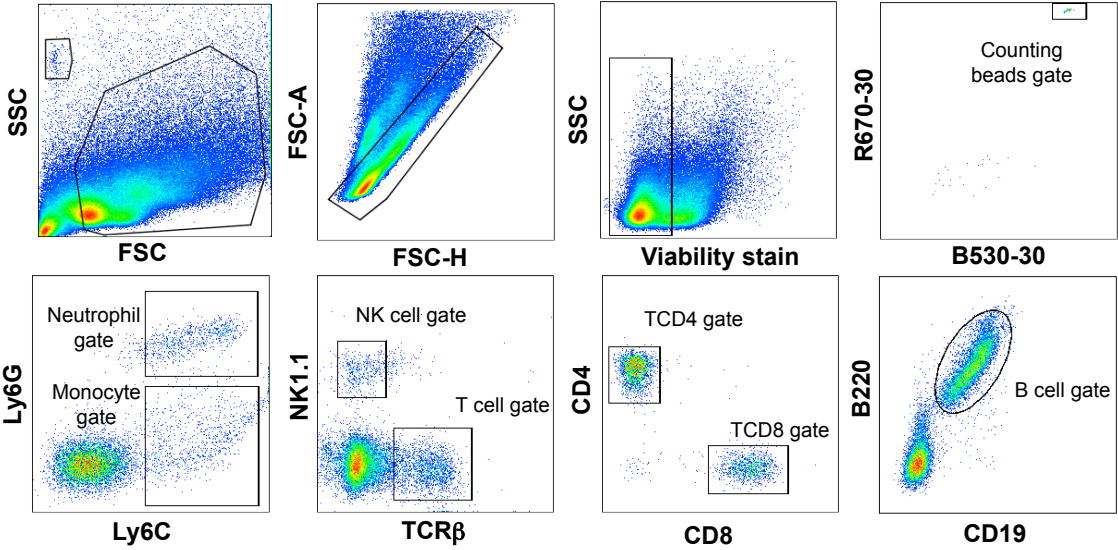

**Supplementary Figure 7:** Gating strategy for leucocyte counting assays. Dot plots are representative from a spleen homogenate.

## Supplementary Figure 8

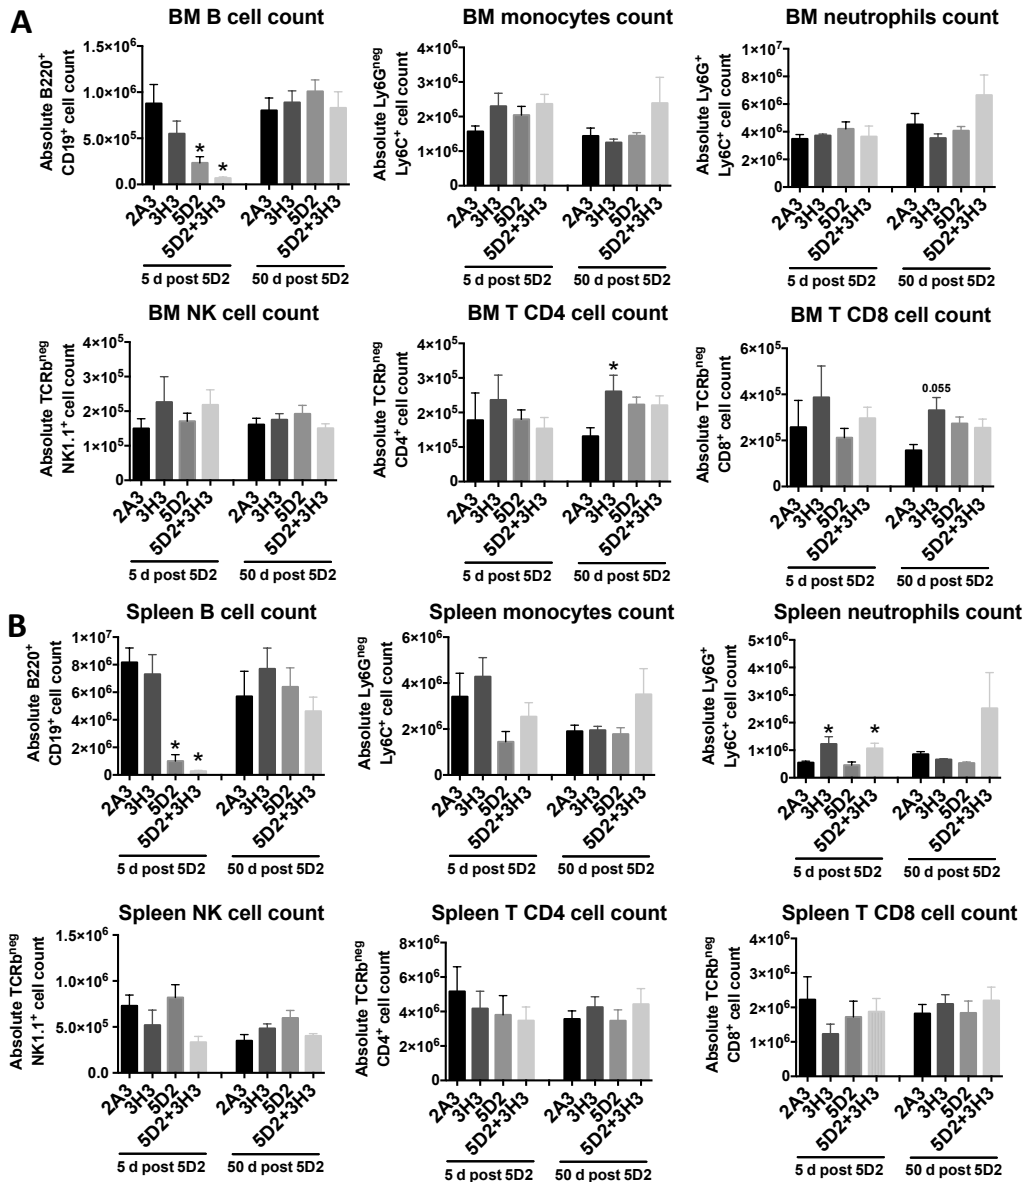

**Supplementary Figure 8.** Treatment with anti-CD20 and anti-CD137 mAbs reduces B cell numbers in bone marrow (BM) and spleen compartments. Leukocyte quantification from BM (A), and spleen (B), after anti-CD20 (clone 5D2, 250  $\mu$ g i.p.) or isotype control antibody (clone 2A3 250  $\mu$ g i.p.) on day 4, and anti-CD137 (clone 3H3, 100  $\mu$ g i.p.) treatment either alone or in combination on day 5 in naive C57BL/6J mice treated according to **Figure 1A**. Blood and organs were collected for leukocyte assessment 5 and 50 days post 5D2 treatment. Bead-based absolute counting was utilized to quantify monocytes/macrophages ( $\text{Ly6G}^{\text{neg}}\text{Ly6C}^+$ ), neutrophils ( $\text{Ly6G}^+\text{Ly6C}^+$ ) NK cells, ( $\text{TCR}\beta^{\text{neg}}\text{NK1.1}^+$ ),  $\text{CD4}^+$  T cells ( $\text{TCR}\beta^+\text{CD4}^+$ ),  $\text{CD8}^+$  T cells ( $\text{TCR}\beta^+\text{CD8}^+$ ). Results are representative of one experiment  $n = 5$  each group. \* $P < 0.05$  was considered statistically significant by Mann-Whitney test.



## Supplementary Figure 9

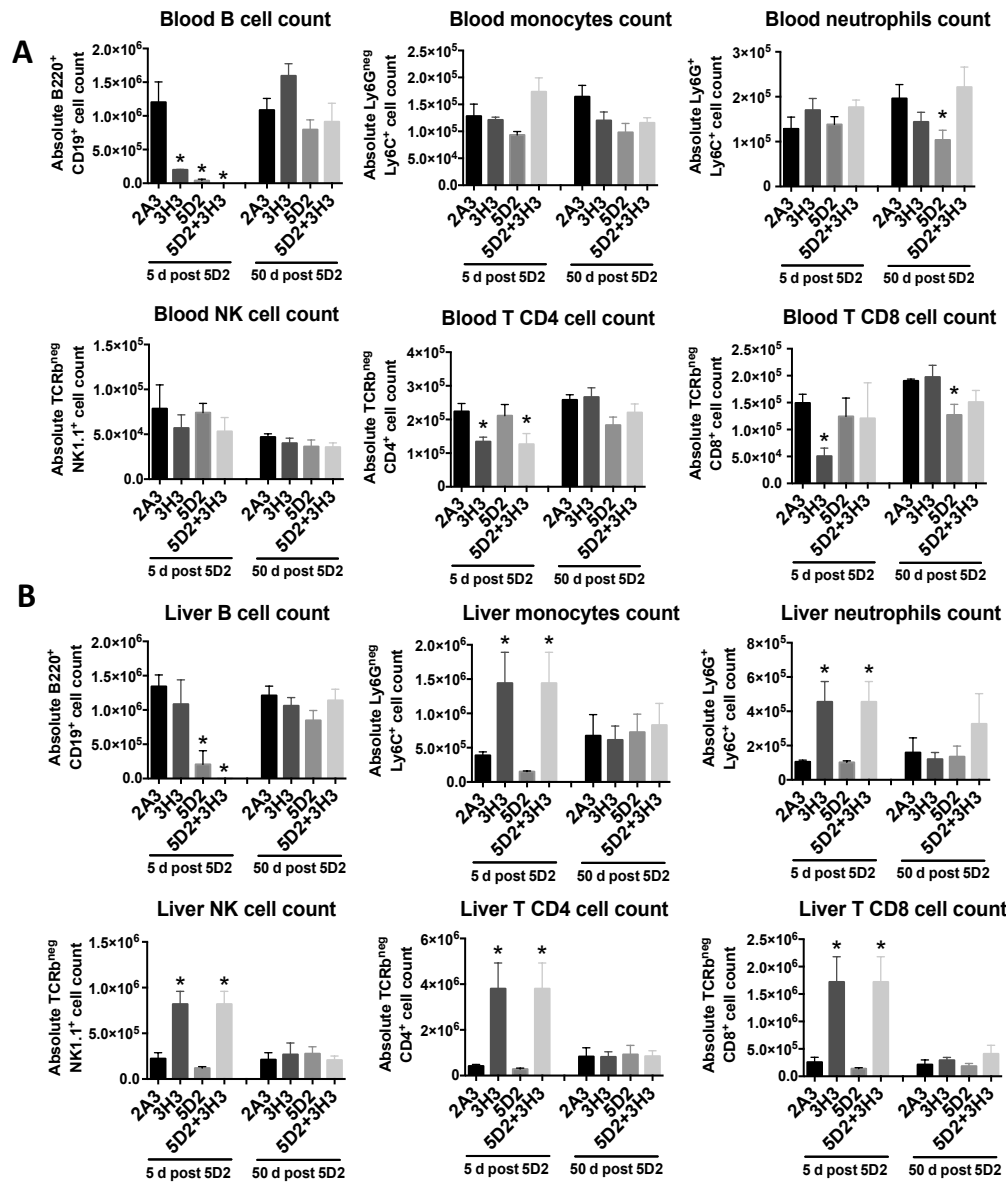

**Supplementary Figure 9.** Treatment with anti-CD20 and anti-CD137 mAbs reduces B cell numbers in peripheral blood (blood) and liver compartments. Leukocyte quantification from blood (A), and liver (B), after anti-CD20 (clone 5D2, 250  $\mu$ g i.p.) or isotype control antibody (clone 2A3 250  $\mu$ g i.p.) on day 4, and anti-CD137 (clone 3H3, 100  $\mu$ g i.p.) treatment either alone or in combination on day 5 in naive C57BL/6J mice treated according to **Figure 1A**. Blood and organs were collected for leukocyte assessment 5 and 50 days post 5D2 treatment. Bead-based absolute counting was utilized to quantify monocytes/macrophages (Ly6G<sup>neg</sup>Ly6C<sup>+</sup>), neutrophils (Ly6G<sup>+</sup>Ly6C<sup>+</sup>) NK cells, (TCR $\beta$ <sup>neg</sup>NK1.1<sup>+</sup>), CD4<sup>+</sup> T cells (TCR $\beta$ <sup>+</sup>CD4<sup>+</sup>), CD8<sup>+</sup> T cells (TCR $\beta$ <sup>+</sup>CD8<sup>+</sup>). Results are representative of one experiment n = 5 each group. \*P < 0.05 was considered statistically significant by Mann-Whitney test.

## Supplementary Figure 10

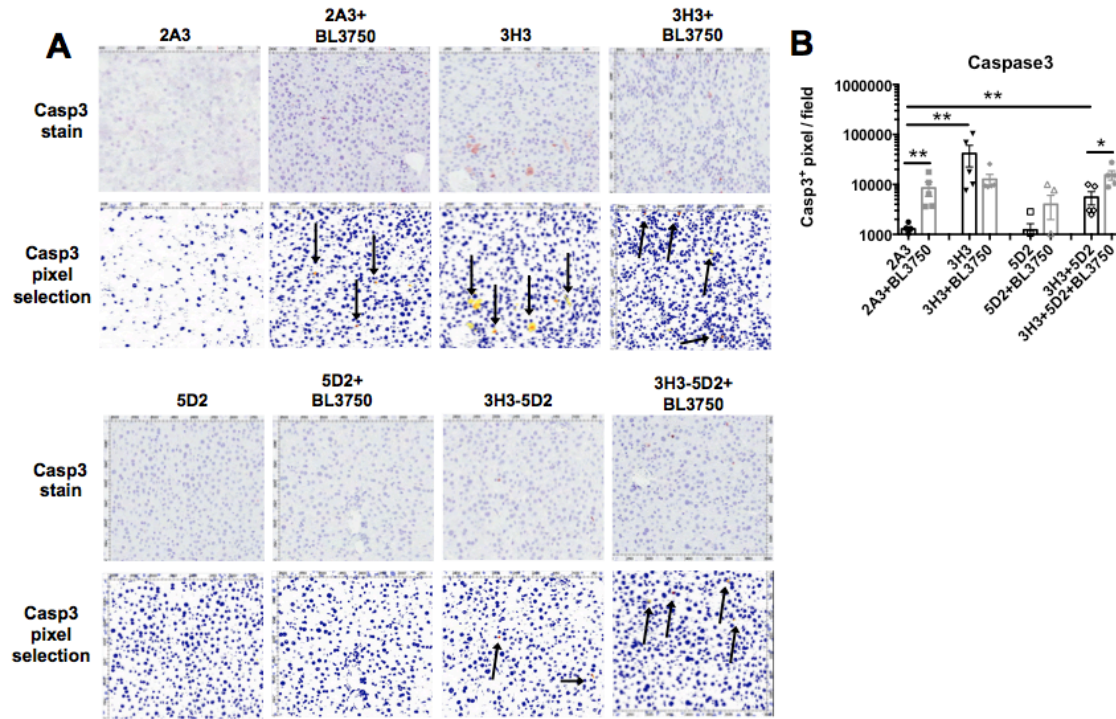

**Supplementary Figure 10:** Greater tissue Caspase-3 levels indicate enhanced liver injury in anti-CD137 and anti-CD137/CD20 treated mice. Caspase 3 immunohistochemistry was performed in liver formalin-fixed sections. Slides were scanned using an Aperio XT slide scanner using 40x scan magnification. **A:** The Aperio Algorithm: Positive Pixel Count V9 was used to quantify positive pixels. A Hue Value = 0.1 was set up to select DAB (Caspase 3) staining and quantify the respectively pixels (selected as yellow by the image analysis) from different groups. Representative Caspase 3 IHC images from liver are shown in the first line according the treatment group, pixel selection by image analysis is represented in the line below. **B:** DAB (Caspase 3)-positive pixel quantification from one field/liver/group is represented. Statistical analysis was performed using Mann-Whitney test, \*\*P < 0.01; n = 5.
